# Supplementary material for: Sequential element control of non-precious dual atom catalysts on mesoporous carbon nanotubes for high performance lithium–oxygen batteries
Source: Royal Society of Chemistry journal article supplement (doi:10.1039/d4ta05490c), 2024-01-01
Supplement: d4ta05490c1.pdf [file d4ta05490c1.pdf]

## Supplementary Information

# Sequential Element Control of Non-Precious Dual Atom Catalysts on Mesoporous Carbon Nanotubes for High Performance Lithium-Oxygen Batteries

*Yeji Lim<sup>a, †</sup>, Hongjun Chang<sup>b, †</sup>, Huiju Kim<sup>a</sup>, Yoon Jeong Yoo<sup>a</sup>, YeoJin Rho<sup>a</sup>, Bo Ran Kim<sup>a</sup>, Hye  
Ryung Byon<sup>c</sup>, Janghyuk Moon<sup>b, \*</sup>, Won-Hee Ryu<sup>a, \*</sup>*

<sup>a</sup>Department of Chemical and Biological Engineering, Sookmyung Women's University, 100 Cheongpa-ro 47-gil, Yongsan-gu, Seoul, 04310, Republic of Korea

<sup>b</sup>Department of Energy Systems Engineering, Chung-Ang University, Heukseok-Ro, Dongjak-Gu, Seoul 06974, Republic of Korea

<sup>c</sup>Department of Chemistry, Korea Advanced Institute of Science and Technology (KAIST), Daejeon 34141, Republic of Korea

\* Corresponding author

E-mail: [whryu@sookmyung.ac.kr](mailto:whryu@sookmyung.ac.kr) (Prof. Won-Hee Ryu), [jhmoon84@cau.ac.kr](mailto:jhmoon84@cau.ac.kr) (Prof. Janghyuk Moon)

† These authors contributed equally to this work.

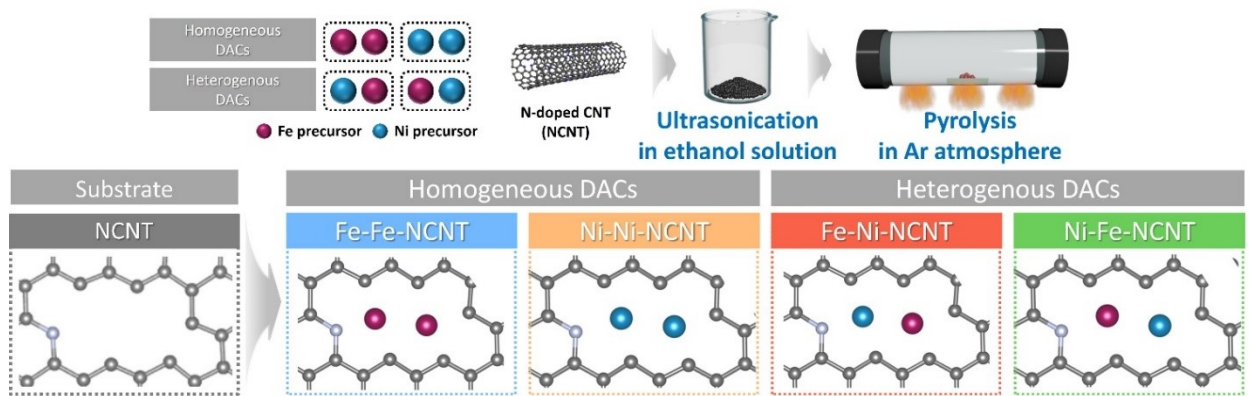

**Figure S1.** Schematic illustration of the synthesis method of homogeneous and heterogeneous DACs.

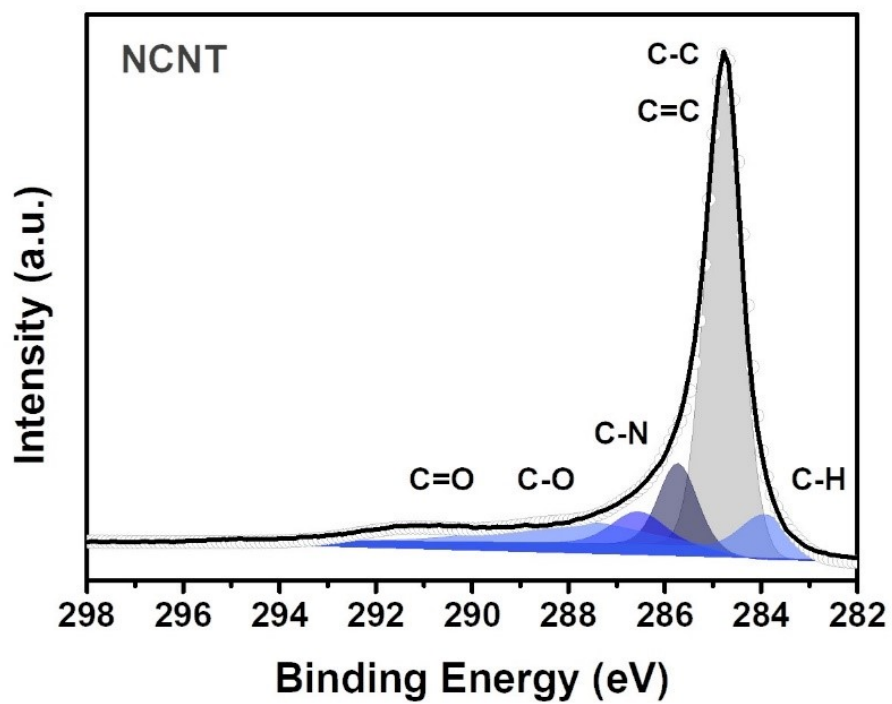

**Figure S2.** The X-ray photoelectron spectroscopy (XPS) spectra of C 1s obtained from the NCNT.

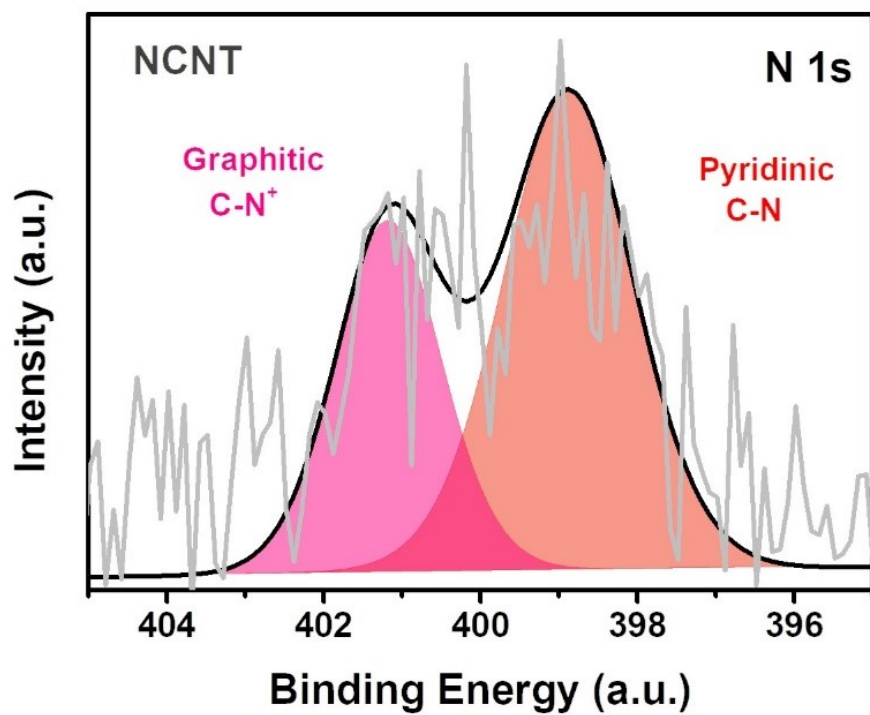

**Figure S3.** The X-ray photoelectron spectroscopy (XPS) spectra of N 1s obtained from the NCNT.

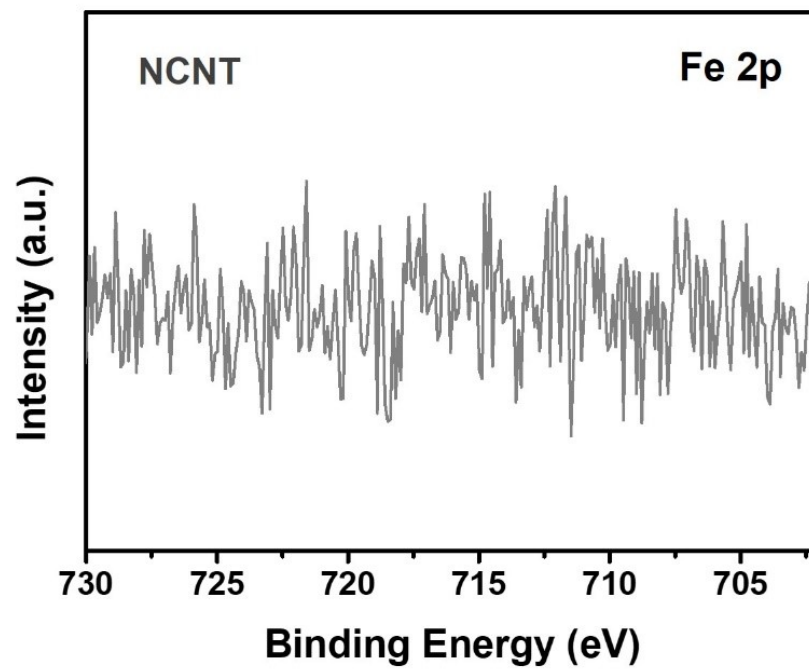

**Figure S4.** The X-ray photoelectron spectroscopy (XPS) spectra of Fe 2p obtained from the NCNT.

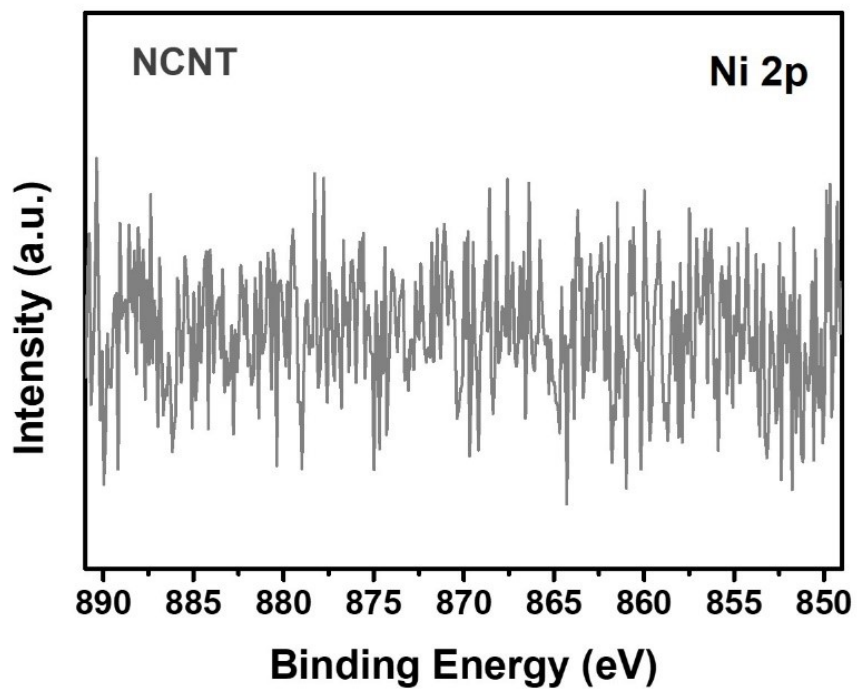

**Figure S5.** The X-ray photoelectron spectroscopy (XPS) spectra of Ni 2p obtained from the NCNT.

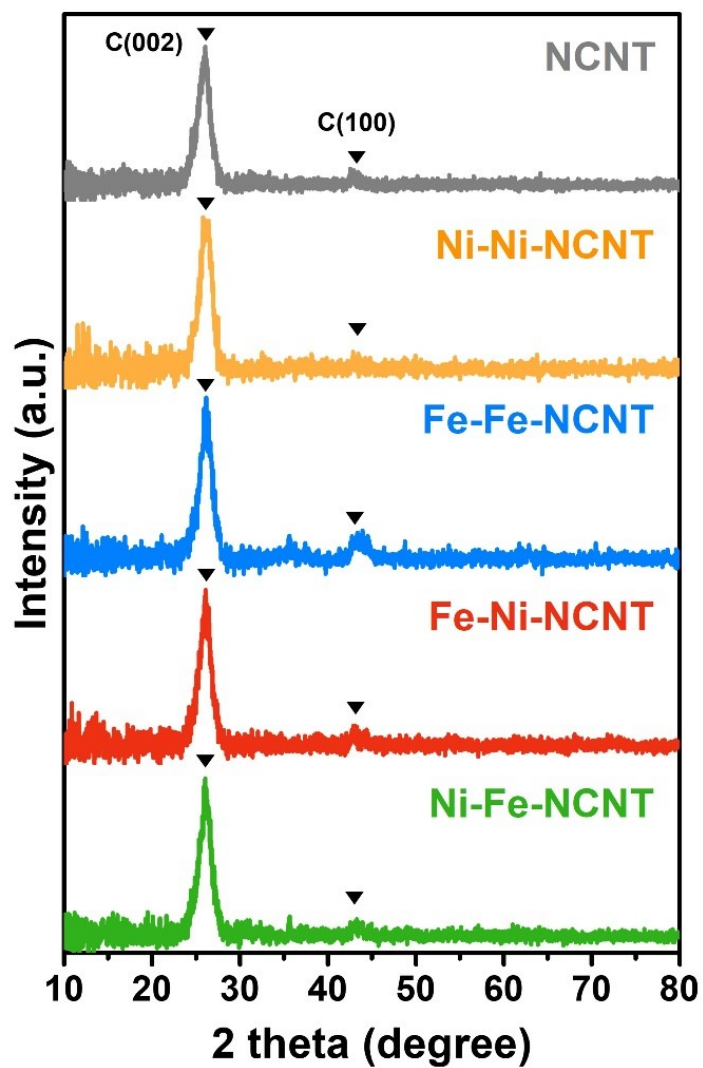

**Figure S6.** The X-ray diffraction (XRD) patterns obtained from the NCNT, Ni-Ni-NCNT, Fe-Fe-NCNT, Fe-Ni-NCNT and Ni-Fe-NCNT.

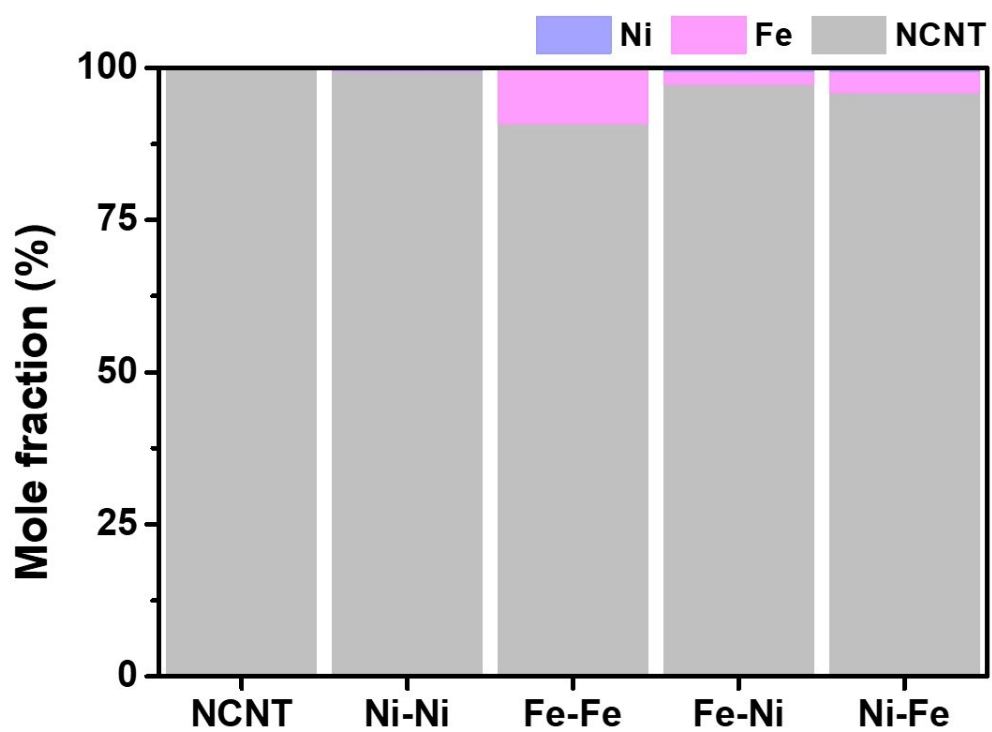

**Figure S7.** The mass spectrometry (MS) of NCNT, Ni-Ni-NCNT, Fe-Fe-NCNT, Fe-Ni-NCNT and Ni-Fe-NCNT.



|                                     | Ni-Ni-NCNT | Fe-Fe-NCNT | Fe-Ni-NCNT | Ni-Fe-NCNT |
|-------------------------------------|------------|------------|------------|------------|
| <b>Metal fraction</b><br><b>(%)</b> | 0.5        | 9.31       | 2.75       | 4.0        |

**Table S1.** The metal mole fraction of Fe-Fe-NCNT, Ni-Ni-NCNT, Fe-Ni-NCNT and Ni-Fe-NCNT.

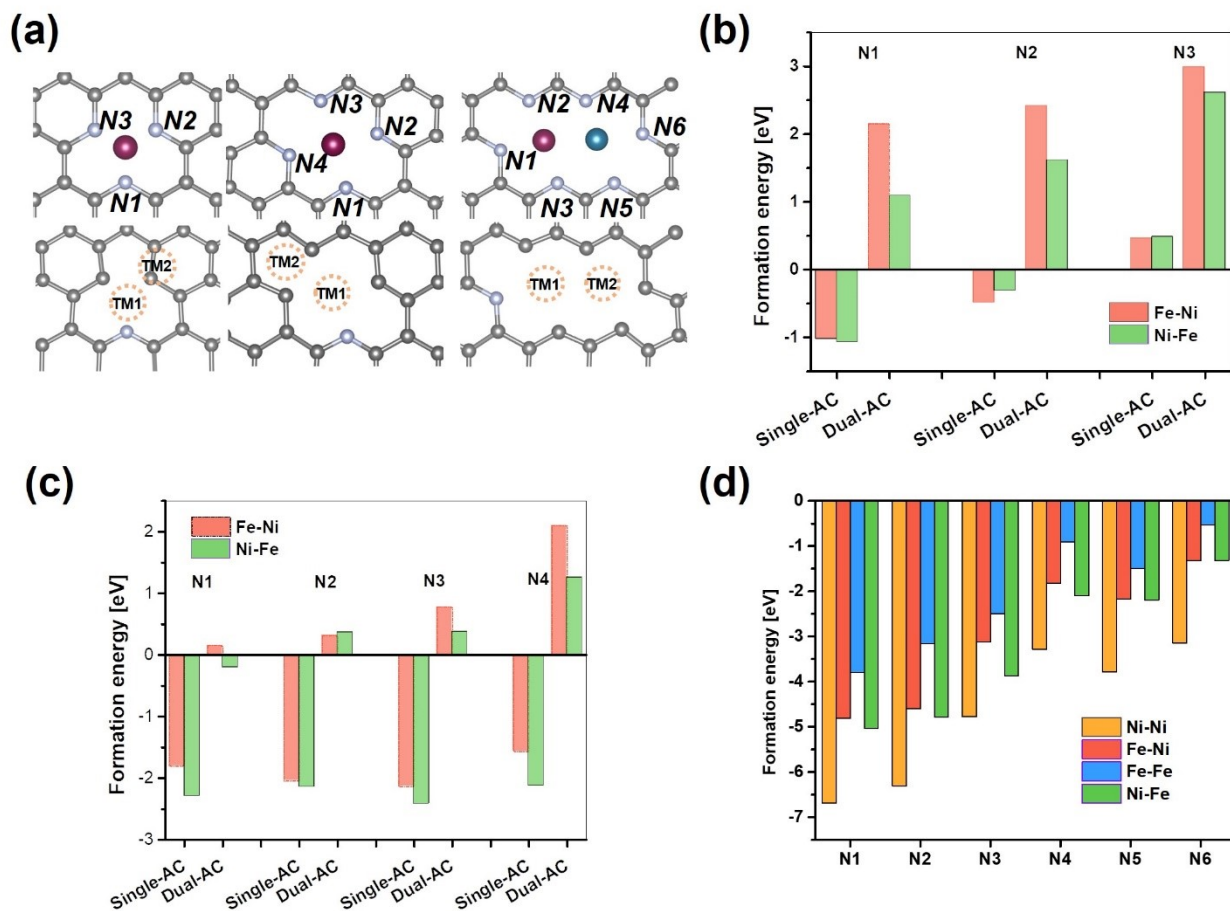

**Figure S8.** (a) Schematic of transition metal adsorption site and pyridinic structure. Transition metal adsorption sites were labeled as TM1 and TM2. Pyridinic structures were labeled as N1~N3 for single vacancy, N1~N4 for divacancy and N1~N6 for meso-pore vacancy structures. (b)-(d) Formation energy after adsorption of transition metal for single, di, and meso-pore vacancy. Single-AC and Dual-AC referred to single atom catalyst and dual atom catalyst. All substrates were named TM2-TM1 in the DFT calculation. The Single-AC denoted a configuration where only TM1 was adsorbed.

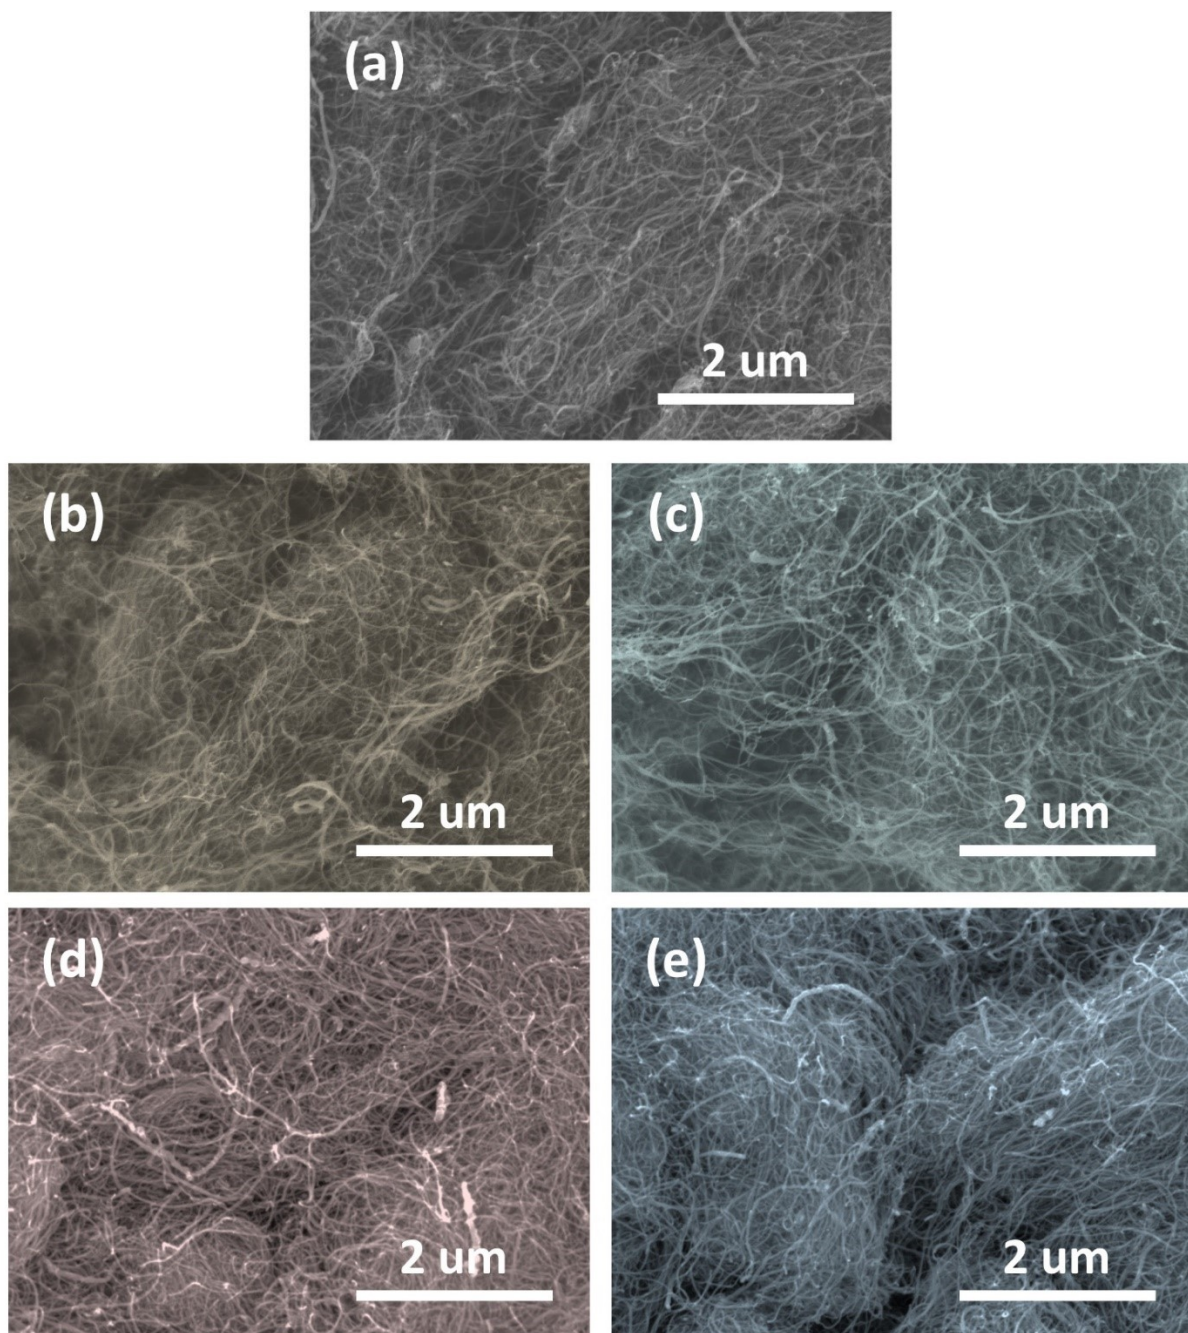

**Figure S9.** The scanning electron microscope (SEM) image obtained from (a) NCNT, (b) Fe-Fe-NCNT, (c) Ni-Ni-NCNT, (d) Fe-Ni-NCNT, (e) Ni-Fe-NCNT and (f) Ni/Fe-NCNT.

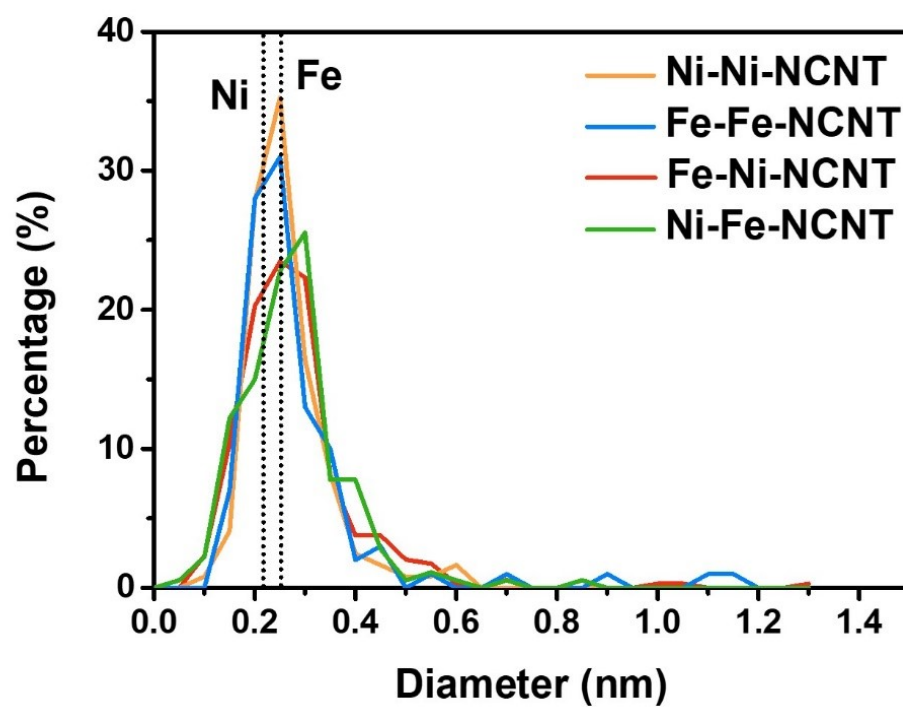

**Figure S10.** The metal particle size distribution of Ni-Ni-NCNT, Fe-Fe-NCNT, Fe-Ni-NCNT and Ni-Fe-NCNT.

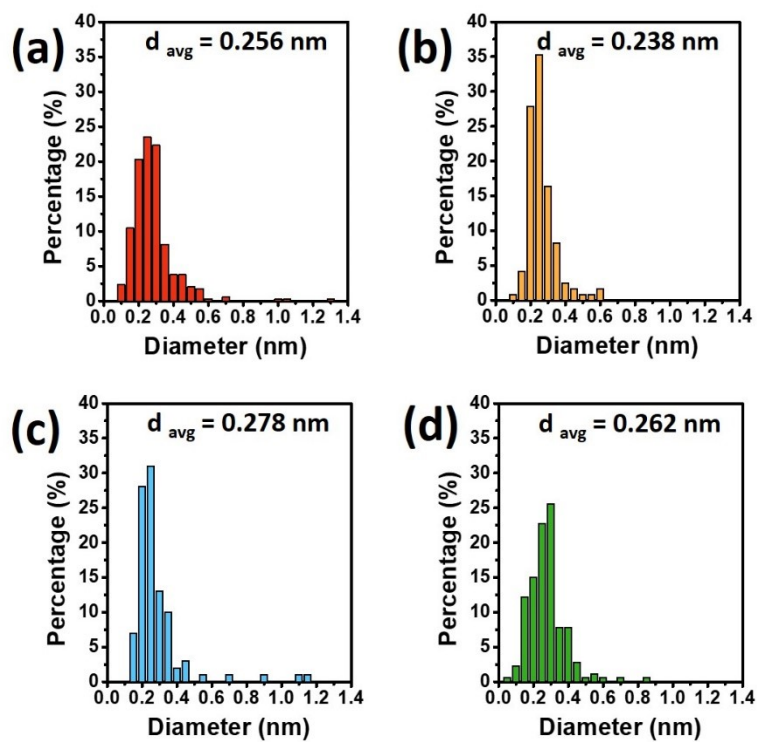

**Figure S11.** Metal particle size distribution of of (a)Fe-Ni-NCNT, (b)Ni-Ni-NCNT, (c)Fe-Fe-NCNT and (d)Ni-Fe-NCNT.

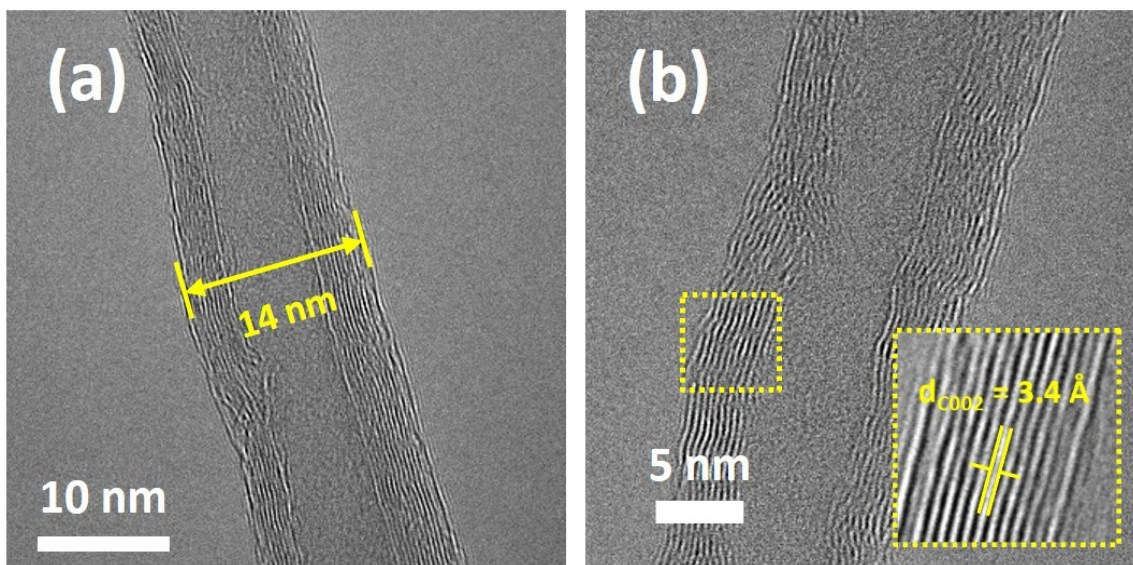

**Figure S12.** (a) The transmission electron microscopy (TEM) images and (b) the d-spacing analysis images of NCNT.

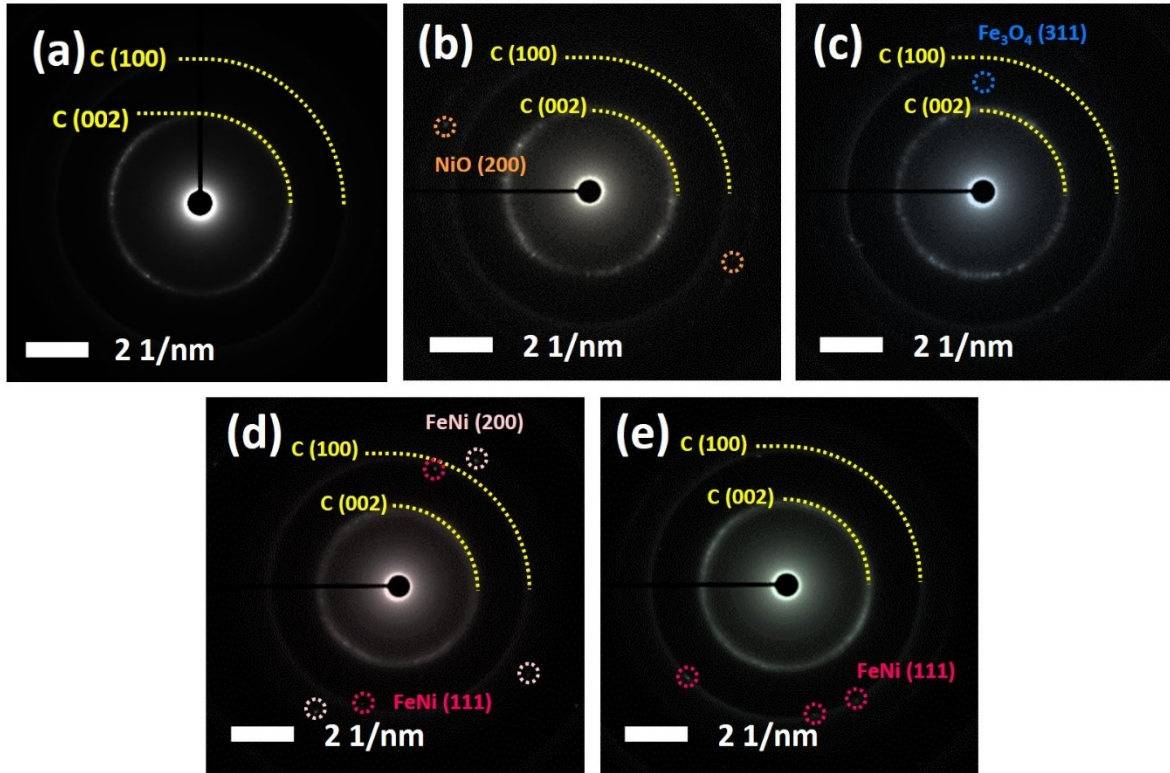

**Figure S13.** The selected area electron diffraction (SEAD) patterns image of (a) NCNT, (b) Ni-Ni-NCNT, (c) Fe-Fe-NCNT, (d) Fe-Ni-NCNT and (e) Ni-Fe-NCNT.

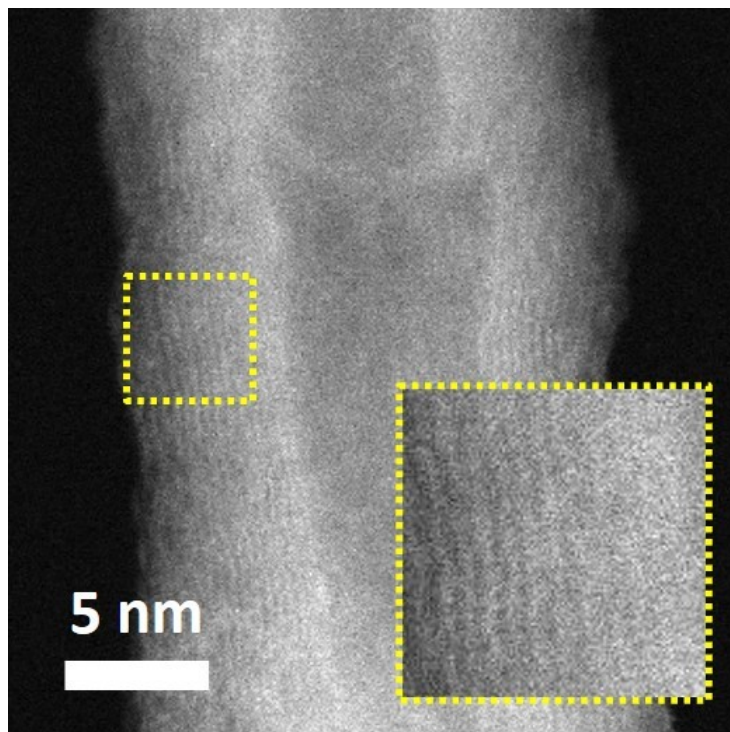

**Figure S14.** The scanning transmission electron microscopy (STEM) images of NCNT.



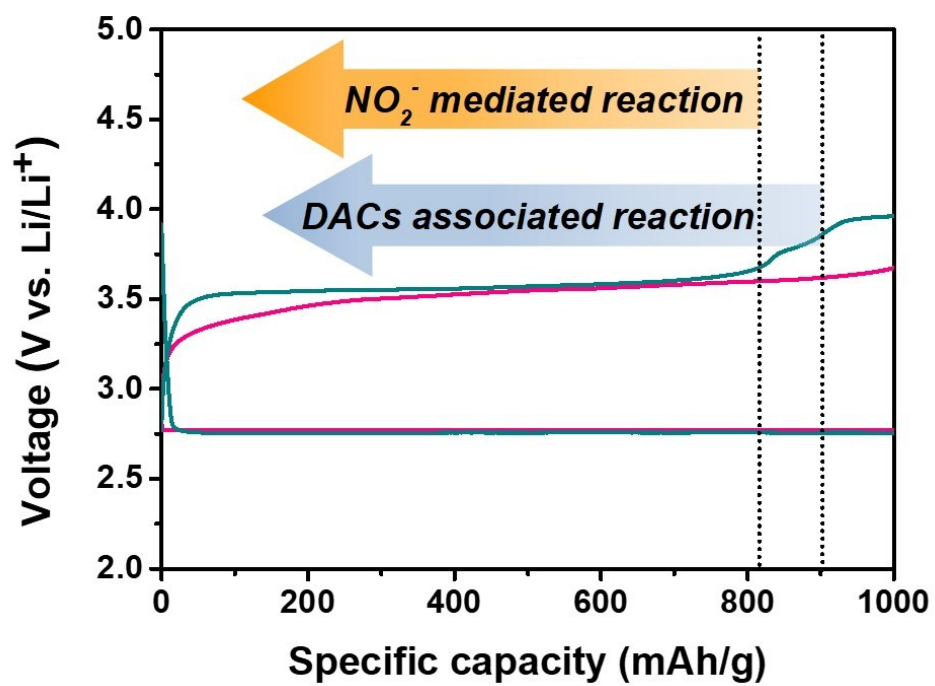

Figure S15. The OER mechanism analysis graph of Li-O<sub>2</sub> cell with DACs.

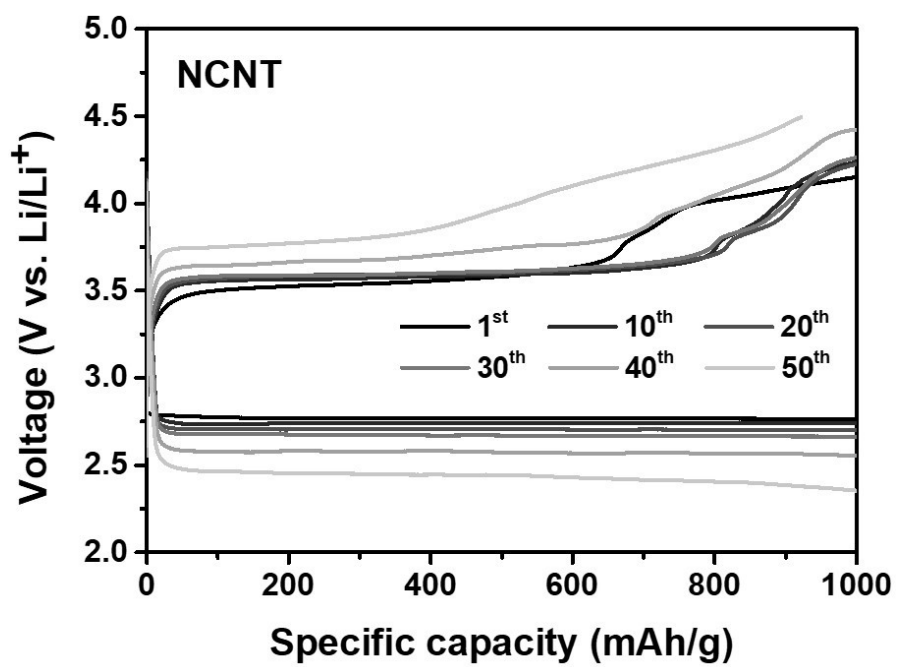

Figure S16. The cycle performance of NCNT in LOB cells.

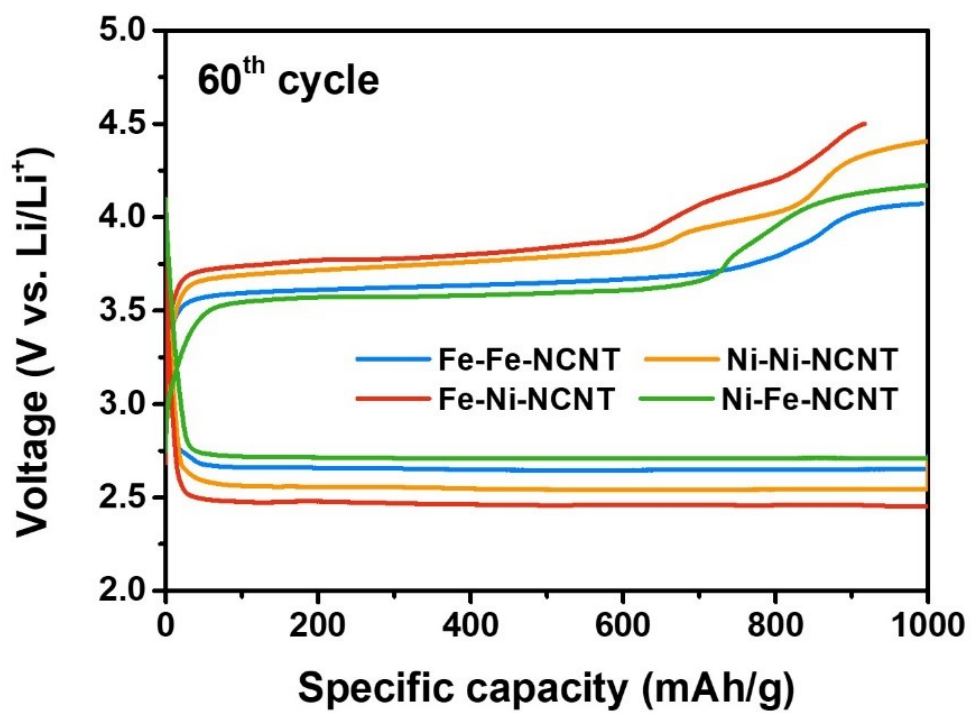

**Figure S17.** The 60<sup>th</sup> cycle performance of Fe-Fe-NCNT, Ni-Ni-NCNT, Fe-Ni-NCNT and Ni-Fe-NCNT.

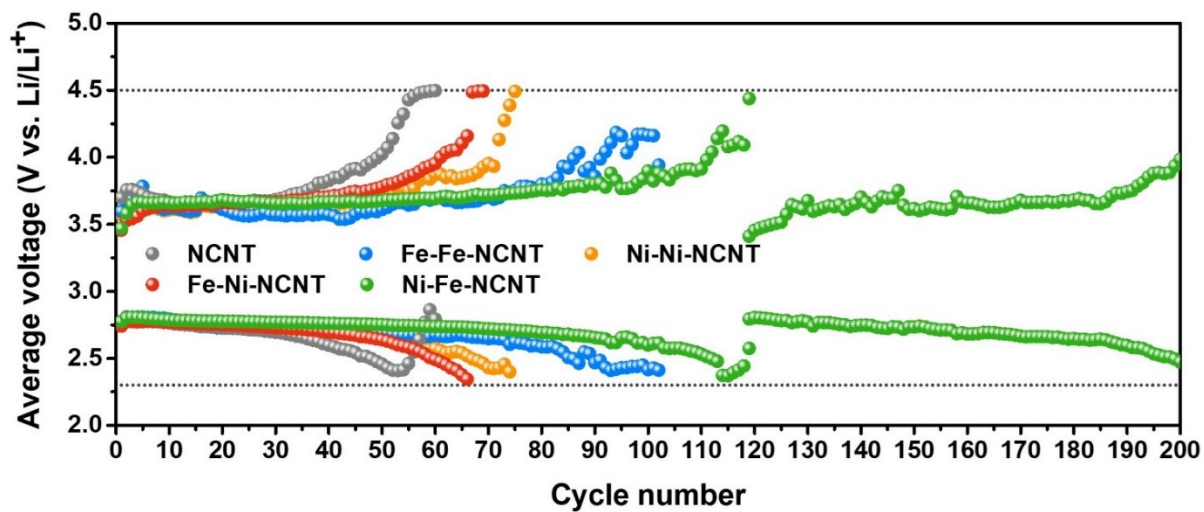

**Figure S18.** The average ORR and OER voltage of NCNT, Ni-Ni-NCNT, Fe-Fe-NCNT, Fe-Ni-NCNT and Ni-Fe-NCNT.

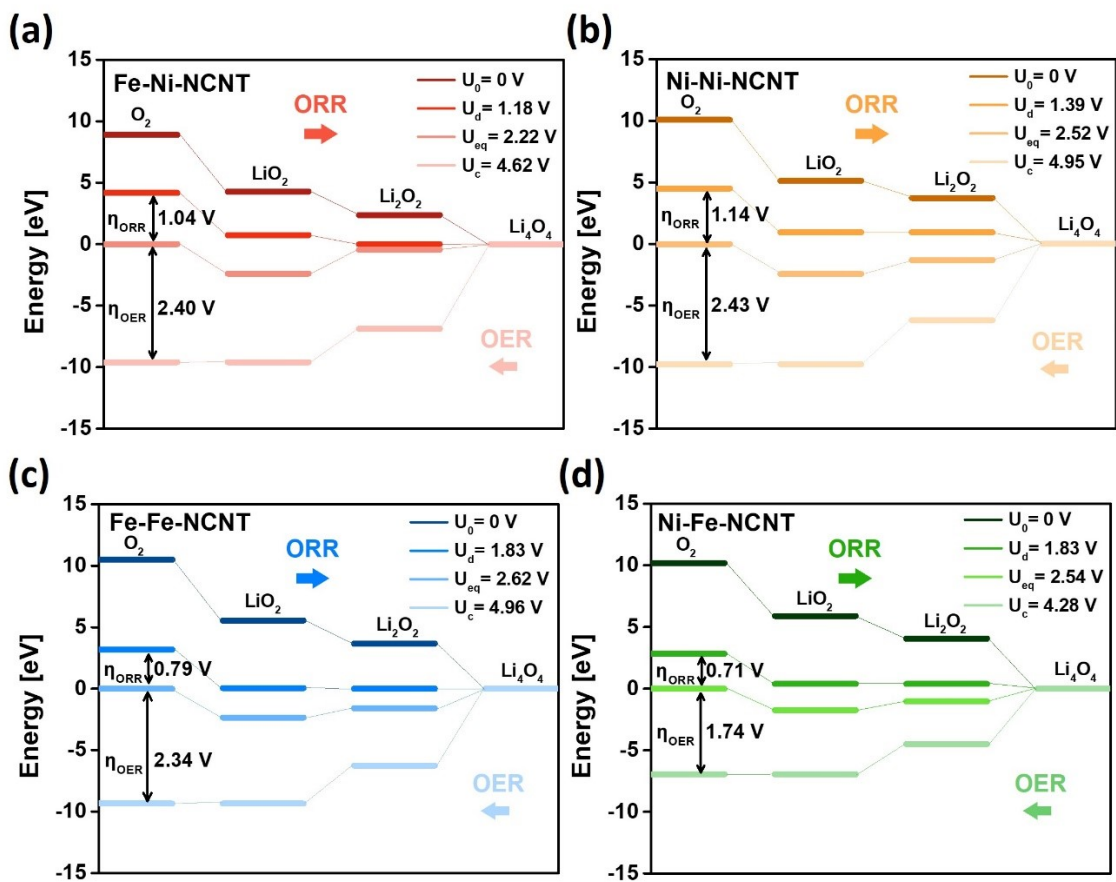

**Figure S19** (a)-(d) Free energy diagram of OER/ORR in Ni-Ni-NCNT, Fe-Fe-NCNT, Fe-Ni-NCNT and Ni-Fe-NCNT.

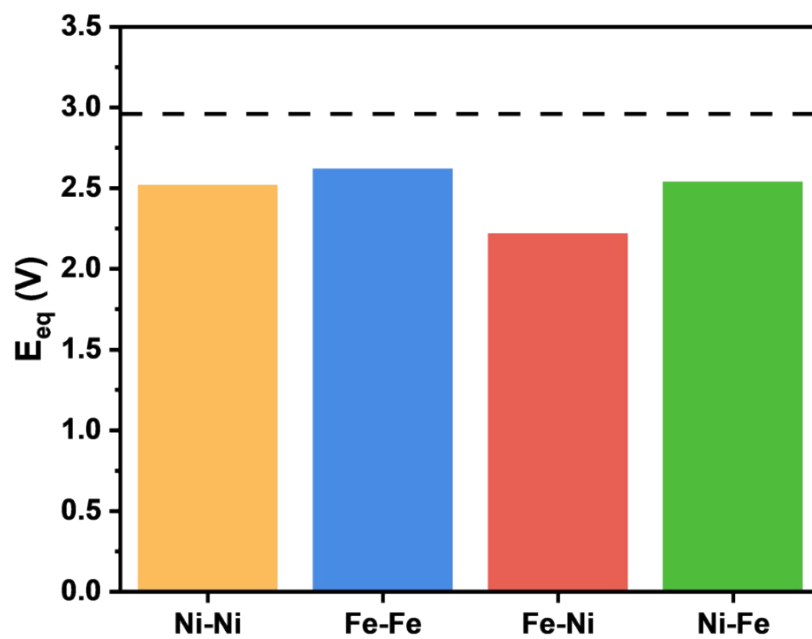

**Figure S20** Equilibrium potential of all DACs cases. The dot line shows standard voltage, 2.96V.

| Structure |                  | Net charge (change) |              |
|-----------|------------------|---------------------|--------------|
|           |                  | Ni                  | Ni           |
| Substrate |                  | 0.54                | 0.64         |
| Ni-Ni     | LiO <sub>2</sub> | 0.81(+0.27e)        | 0.80(+0.16e) |
|           | NO <sub>2</sub>  | 0.90(+0.36e)        | 0.75(+0.11e) |
|           |                  | Fe                  | Fe           |
| Substrate |                  | 0.91                | 1.01         |
| Fe-Fe     | LiO <sub>2</sub> | 1.07(+0.16e)        | 1.21(+0.20e) |
|           | NO <sub>2</sub>  | 1.11(+0.20e)        | 1.23(+0.21e) |
|           |                  | Fe                  | Ni           |
| Substrate |                  | 0.98                | 0.56         |
| Fe-Ni     | LiO <sub>2</sub> | 1.15(+0.17e)        | 0.79(+0.23e) |
|           | NO <sub>2</sub>  | 1.35(+0.37e)        | 0.65(+0.09e) |
|           |                  | Ni                  | Fe           |
| Substrate |                  | 0.42                | 1.33         |
| Ni-Fe     | LiO <sub>2</sub> | 0.55(+0.13e)        | 1.78(+0.45e) |
|           | NO <sub>2</sub>  | 0.26(-0.16e)        | 2.26(+0.93e) |

**Table S2.** Bader net charge and charge change value of transition metal after adsorption of LiO<sub>2</sub> & NO<sub>2</sub> on Ni-Ni-NCNT, Fe-Fe-NCNT, Fe-Ni-NCNT and Ni-Fe-NCNT.

**ORR/OER activation**      **RM stabilization**

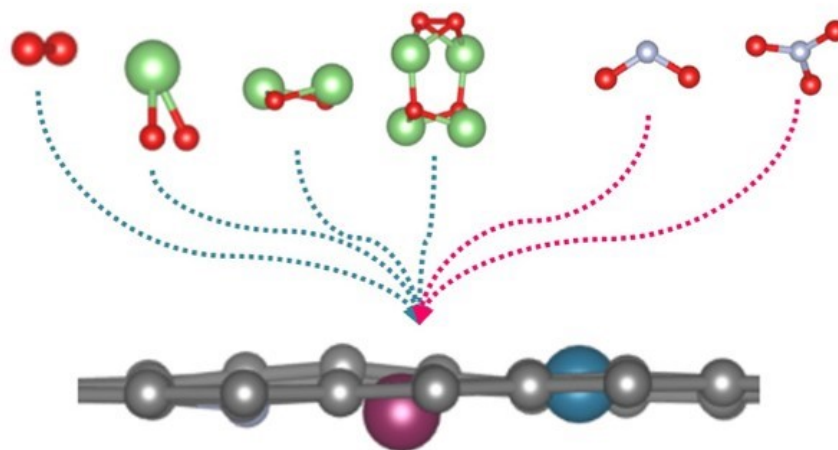

**Figure S21.** Schematic illustration for roles of DACs.



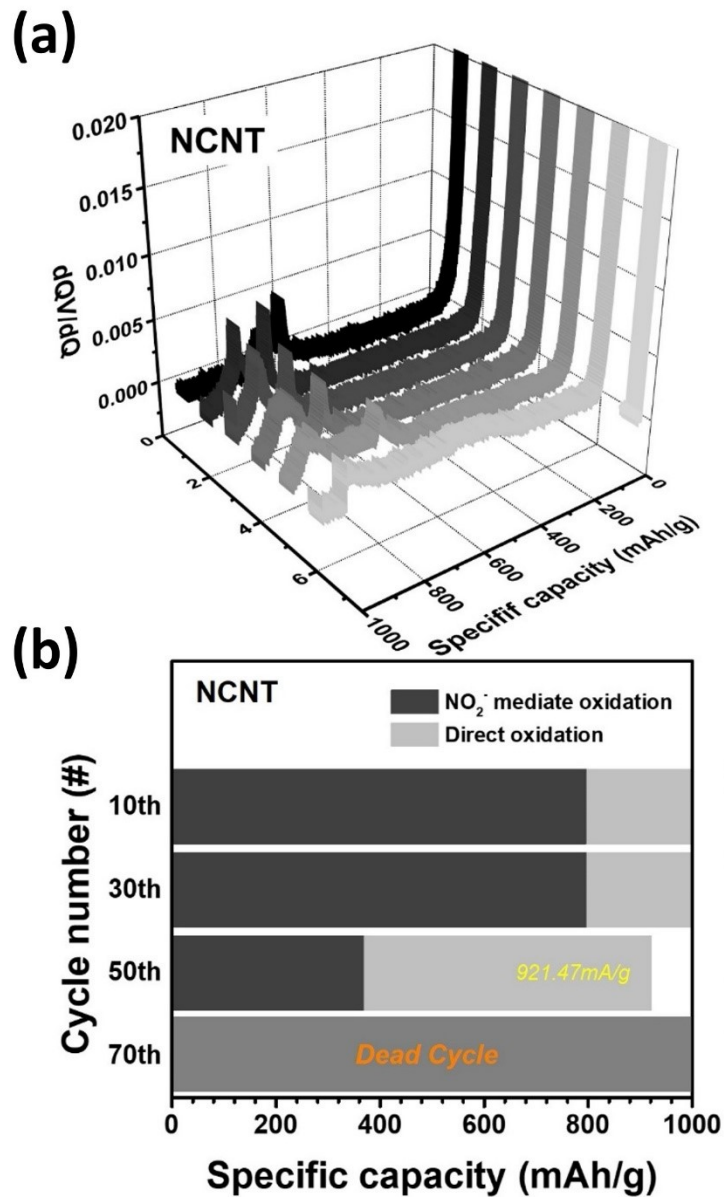

**Figure S22.** (a) The  $dV/dQ$  curves of the NCNT obtained from the 10<sup>th</sup> to the 70<sup>th</sup> cycle. (b) Ratios of “NO<sub>2</sub><sup>-</sup> mediate oxidation”, “DACs associated oxidation” and “Direct oxidation” of NCNT obtained from the 10<sup>th</sup> to the 70<sup>th</sup> cycle.

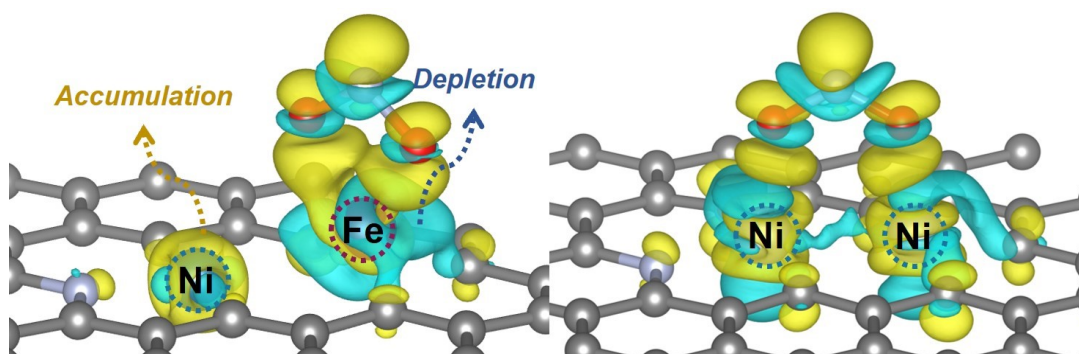

**Figure S23.** Calculated charge density difference plot NO<sub>2</sub> on Fe-Ni-NCNT and Ni-Ni-NCNT.
